# Supplementary material for: Alcalase-Based Chickpea (Cicer arietinum L.) Protein Hydrolysates Efficiently Reduce Systolic Blood Pressure in Spontaneously Hypertensive Rats
Source: MDPI journal article supplement (doi:10.3390/foods13081216), 2024-04-16
Supplement: s1 [file s1]

**Supplementary Table S1.** Experimental design of alcalase hydrolysis conditions generated by response surface analysis and ACE-I inhibition of chickpea hydrolysates.

| Std | Run | Factor 1, A:<br>Time (h) | Factor 2, B:<br>Enzyme/Sustrate<br>Concentration<br>(U/g)* | Factor 3, C:<br>Temperature<br>(°C) | Response<br>Variable<br>ACE-I<br>inhibition<br>(%) |
|-----|-----|--------------------------|------------------------------------------------------------|-------------------------------------|----------------------------------------------------|
| 21  | 1   | 1.5                      | 0.158393                                                   | 50                                  | 44.79                                              |
| 31  | 2   | 1.5                      | 0.3                                                        | 50                                  | 45.11                                              |
| 11  | 3   | 2.5                      | 0.2                                                        | 60                                  | 41.43                                              |
| 8   | 4   | 2.5                      | 0.4                                                        | 40                                  | 47.65                                              |
| 7   | 5   | 2.5                      | 0.4                                                        | 40                                  | 48.86                                              |
| 20  | 6   | 2.91607                  | 0.3                                                        | 50                                  | 46.16                                              |
| 24  | 7   | 1.5                      | 0.441607                                                   | 50                                  | 42.25                                              |
| 30  | 8   | 1.5                      | 0.3                                                        | 50                                  | 44.32                                              |
| 18  | 9   | 0.08393                  | 0.3                                                        | 50                                  | 57.79                                              |
| 29  | 10  | 1.5                      | 0.3                                                        | 50                                  | 47.02                                              |
| 28  | 11  | 1.5                      | 0.3                                                        | 64.1607                             | 45.34                                              |
| 25  | 12  | 1.5                      | 0.3                                                        | 35.8393                             | 49.49                                              |
| 32  | 13  | 1.5                      | 0.3                                                        | 50                                  | 45.54                                              |
| 13  | 14  | 0.5                      | 0.4                                                        | 60                                  | 48.86                                              |
| 12  | 15  | 2.5                      | 0.2                                                        | 60                                  | 36.65                                              |
| 26  | 16  | 1.5                      | 0.3                                                        | 35.8393                             | 49.14                                              |
| 4   | 17  | 2.5                      | 0.2                                                        | 40                                  | 44.24                                              |
| 33  | 18  | 1.5                      | 0.3                                                        | 50                                  | 48.28                                              |
| 22  | 19  | 1.5                      | 0.158393                                                   | 50                                  | 43.77                                              |
| 15  | 20  | 2.5                      | 0.4                                                        | 60                                  | 41.31                                              |
| 3   | 21  | 2.5                      | 0.2                                                        | 40                                  | 53.88                                              |
| 14  | 22  | 0.5                      | 0.4                                                        | 60                                  | 49.92                                              |
| 19  | 23  | 2.91607                  | 0.3                                                        | 50                                  | 47.34                                              |
| 2   | 24  | 0.5                      | 0.2                                                        | 40                                  | 53.21                                              |
| 9   | 25  | 0.5                      | 0.2                                                        | 60                                  | 46.52                                              |
| 1   | 26  | 0.5                      | 0.2                                                        | 40                                  | 56.38                                              |
| 6   | 27  | 0.5                      | 0.4                                                        | 40                                  | 51.76                                              |
| 17  | 28  | 0.08393                  | 0.3                                                        | 50                                  | 55.80                                              |
| 10  | 29  | 0.5                      | 0.2                                                        | 60                                  | 43.01                                              |
| 23  | 30  | 1.5                      | 0.441607                                                   | 50                                  | 44.29                                              |
| 27  | 31  | 1.5                      | 0.3                                                        | 64.1607                             | 47.86                                              |
| 5   | 32  | 0.5                      | 0.4                                                        | 40                                  | 50.87                                              |
| 16  | 33  | 2.5                      | 0.4                                                        | 60                                  | 43.78                                              |

\* A total of 10 µL of chickpea protein hydrolysate (10 mg/mL) was used for the inhibition assays.

**Supplementary Table S2.** ANOVA for the effect of processing variables on ACE-I inhibition.

| Source                           | Sum of Squears | df | Mean Squear | F-value | p-value  |
|----------------------------------|----------------|----|-------------|---------|----------|
| Model                            | 550.7561       | 8  | 68.8445     | 11.3186 | < 0.0001 |
| A- Time                          | 210.9852       | 1  | 210.9852    | 34.6878 | < 0.0001 |
| B- Enzyme/Sustrate Concentration | 0.9704         | 1  | 0.9704      | 0.1595  | 0.6931   |
| C- Temperature                   | 165.6406       | 1  | 165.6406    | 27.2328 | < 0.0001 |
| AB                               | 0.6054         | 1  | 0.6054      | 0.0995  | 0.7551   |
| AC                               | 3.5782         | 1  | 3.5782      | 0.5883  | 0.4506   |
| BC                               | 38.5489        | 1  | 38.5489     | 6.3378  | 0.0189   |
| A2                               | 76.7910        | 1  | 76.7910     | 12.6251 | 0.0016   |
| B2                               | 40.8865        | 1  | 40.8865     | 6.7221  | 0.0160   |
| Residual                         | 145.9776       | 24 | 6.0824      |         |          |
| Lack of Fit                      | 53.7229        | 6  | 8.9538      | 1.7470  | 0.1674   |
| Pure Error                       | 92.2547        | 18 | 5.1253      |         |          |
| Cor Total                        | 696.7337       | 32 |             |         |          |
